# Supplementary material for: Influence of Molecular Weight and Grafting Density of PEG on the Surface Properties of Polyurethanes and Their Effect on the Viability and Morphology of Fibroblasts and Osteoblasts
Source: MDPI journal article supplement (doi:10.3390/polym14224912), 2022-11-14
Supplement: s1 [file s1]

## Supplementary Material

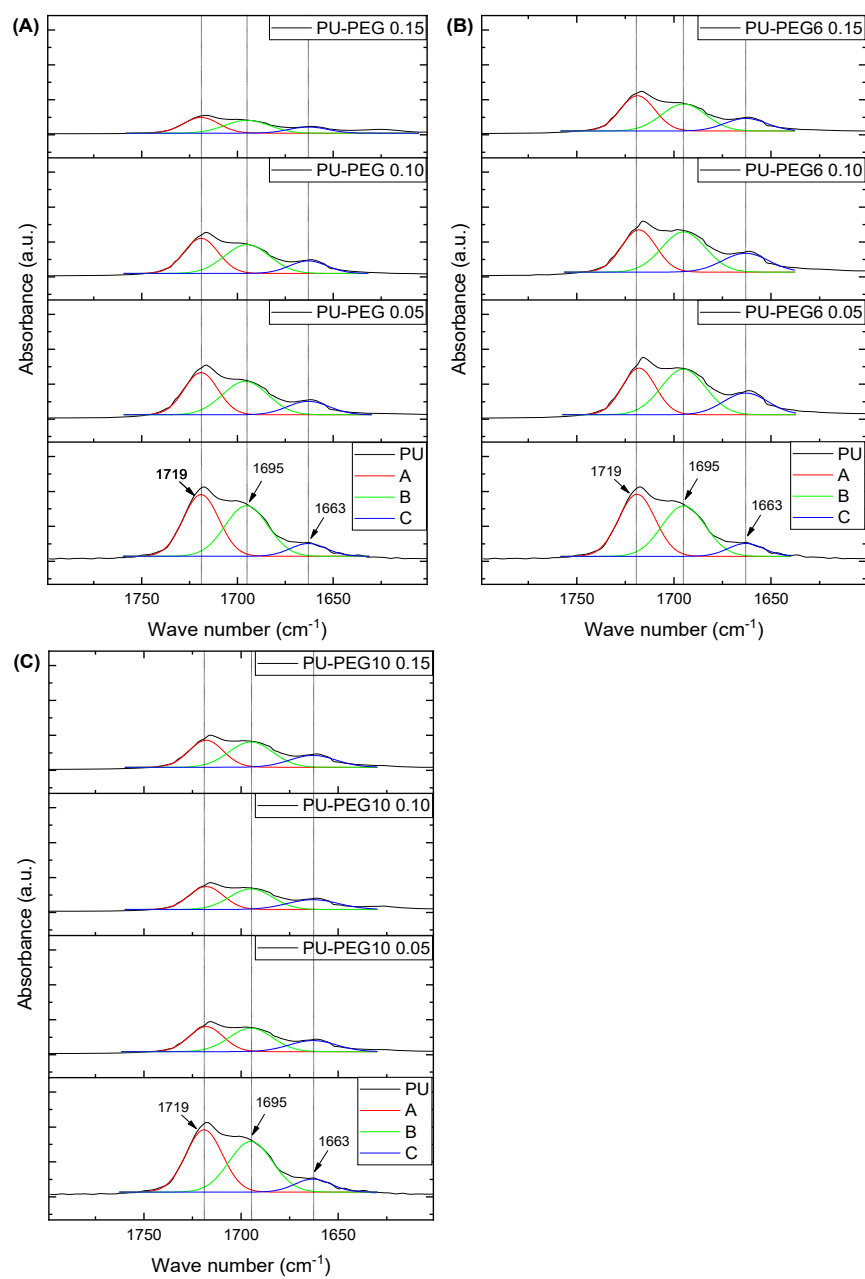

**Figure S1.** Deconvolution of the carbonyl bands from unmodified and PEG-grafted substrata. (A) PEG2-grafted PU; (B) PEG6-grafted PU; (C) PEG10-grafted PU.

**Table S2.** Band ratios of carbonyl bands from unmodified and PEG-grafted substrata.

| <b>Sample</b> | <b>C/(A+B)</b> |
|---------------|----------------|
| PU            | 0.146          |
| PU-PEG2 0.05  | 0.211          |
| PU-PEG2 0.10  | 0.226          |
| PU-PEG2 0.15  | 0.243          |
| PU-PEG6 0.05  | 0.256          |
| PU-PEG6 0.10  | 0.254          |
| PU-PEG6 0.15  | 0.234          |
| PU-PEG10 0.05 | 0.260          |
| PU-PEG10 0.10 | 0.254          |
| PU-PEG10 0.15 | 0.234          |

**A:** 1719 cm<sup>-1</sup> band; **B:** 1695 cm<sup>-1</sup> band; **C:** 1663 cm<sup>-1</sup> band.

**Table S3.** Decomposition temperatures (Td) of PU, PEG and PEG-grafted substrata.

| <b>Sample</b> | <b>Td1<br/>(°C)</b> | <b>Td2<br/>(°C)</b> |
|---------------|---------------------|---------------------|
| PU            | 340                 | 413                 |
| PEG2          | -                   | 405                 |
| PU-PEG2 0.05  | 315                 | 406                 |
| PU-PEG2 0.10  | 319                 | 405                 |
| PU-PEG2 0.15  | 328                 | 405                 |
| PEG6          | -                   | 413                 |
| PU-PEG6 0.05  | 330                 | 407                 |
| PU-PEG6 0.10  | 319                 | 406                 |
| PU-PEG6 0.15  | 334                 | 415                 |
| PEG10         | -                   | 417                 |
| PU-PEG10 0.05 | 340                 | 411                 |
| PU-PEG10 0.10 | 340                 | 414                 |
| PU-PEG10 0.15 | 340                 | 414                 |

**Table S4.** pH measurements of culture medium (DMEM) with the PEG diluted.

|            | PEG amount |                 | pH   |
|------------|------------|-----------------|------|
|            | (mg/mL)    | ( $\mu$ mol/mL) |      |
| DMEM       | 0          | 0.0             | 8.50 |
| DMEM-PEG2  | 1          | 0.5             | 8.57 |
|            | 2          | 1.0             | 8.65 |
|            | 3          | 1.5             | 8.70 |
| DMEM-PEG6  | 1          | 0.2             | 8.57 |
|            | 2          | 0.3             | 8.64 |
|            | 3          | 0.5             | 8.70 |
| DMEM-PEG10 | 1          | 0.1             | 8.57 |
|            | 2          | 0.2             | 8.65 |
|            | 3          | 0.3             | 8.70 |
